# Supplementary material for: A Stevedore's Protein Knot
Source: PubMed Central journal article supplement (PMC2848546; doi:10.1371/journal.pcbi.1000731), 2010-04-01
Supplement: pcbi.1000731.s001.pdf [file pcbi.1000731.s001.pdf]

## Supplementary Material

*Daniel Bolinger, Joanna I. Sulikowska, Hsiao-Ping Hsu, Leonid A. Mirny, Mehran Kardar, Jose N. Onuchic and Peter Virnau*

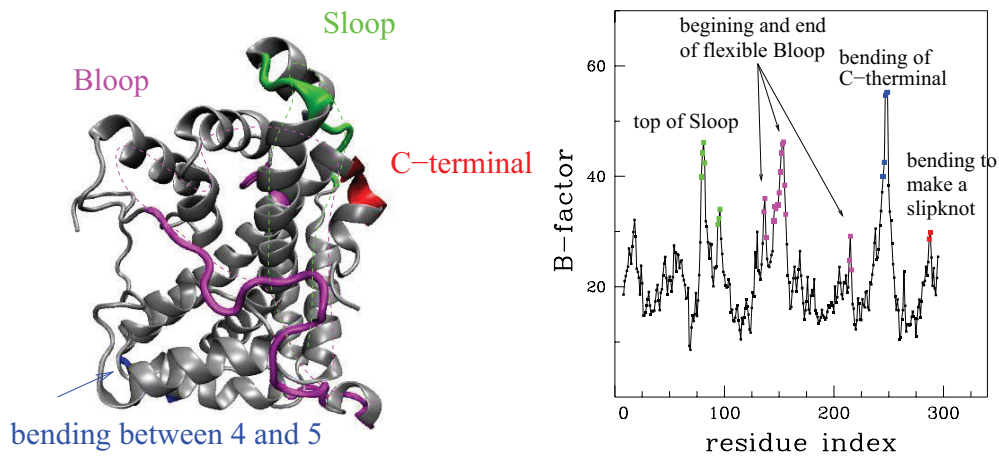

Figure 1: Structural elements of DehI and B-factors.

Left, cartoon representation of DehI. Colors highlight the 5 major structural sections of the protein 1. amino acids 1-64 - several  $\alpha$ -helices, 2. amino acids 64-135: S-loop - two long  $\alpha$ -helices, 3. amino acids 135-234: B-loop 3  $\alpha$ -helices connected by a proline-rich unstructured part of the backbone, 4. amino acids 234-252: segment of the backbone which crosses the B-loop, 5. Long  $\alpha$ -helix which crosses B-loop and S-loop. Right, mean square fluctuations of individual residues presented as B factor.
