# Supplementary material for: A Stevedore's Protein Knot
Source: PubMed Central journal article supplement (PMC2848546; doi:10.1371/journal.pcbi.1000731), 2010-04-01
Supplement: pcbi.1000731.s003.pdf [file pcbi.1000731.s003.pdf]

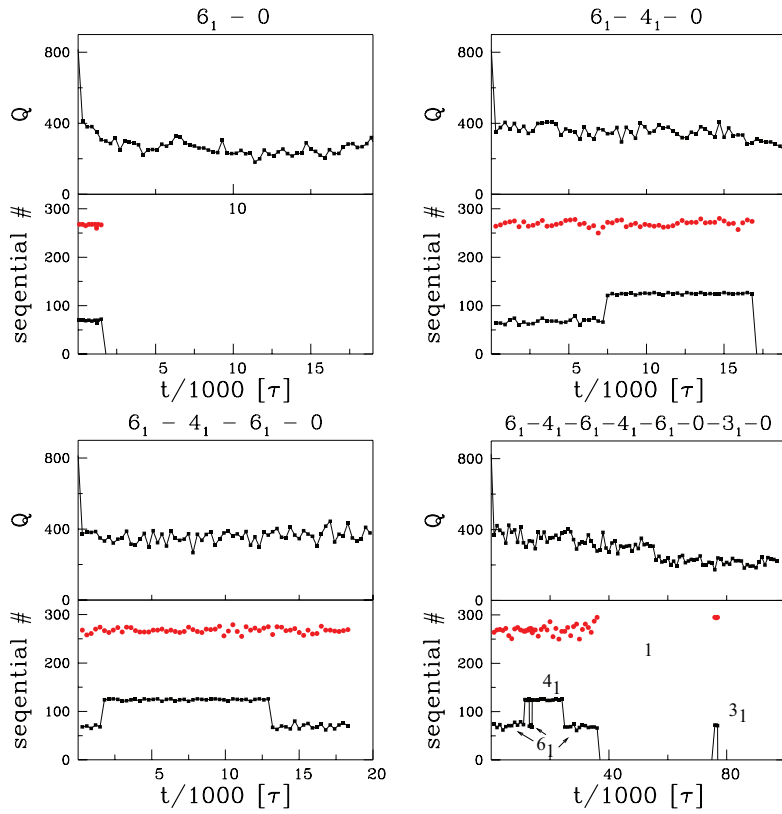

Figure 3: Unfolding routes which lead to unknotted conformations.

Top panels represent the  $Q$  values for a given time. The bottom panels display the position of the knot ends and the knot type.
